# Supplementary material for: Grain size control in the fabrication of large single-crystal bilayer graphene structures
Source: Royal Society of Chemistry journal article supplement (doi:10.1039/c4nr06607c), 2014-12-15
Supplement: c4nr06607c1.pdf [file c4nr06607c1.pdf]

**Supporting Information for**  
**Grain Size Control for Large Bilayer Graphene**

Lin Gan<sup>1</sup>, Haijing Zhang<sup>2</sup>, Ruizhe Wu<sup>1</sup>, Qicheng Zhang<sup>1</sup>, Xuewu Ou<sup>1</sup>, Yao Ding<sup>1</sup>, Ping Sheng<sup>2</sup> and Zhengtang Luo<sup>1,\*</sup>

<sup>1</sup>Department of Chemical and Biomolecular Engineering, The Hong Kong University of Science and Technology, Clear Water Bay, Kowloon, Hong Kong

<sup>2</sup>Department of Physics and William Mong Institute of Nano Science and Technology, The Hong Kong University of Science and Technology, Clear Water Bay, Kowloon, Hong Kong, China

Email: [keztluo@ust.hk](mailto:keztluo@ust.hk)

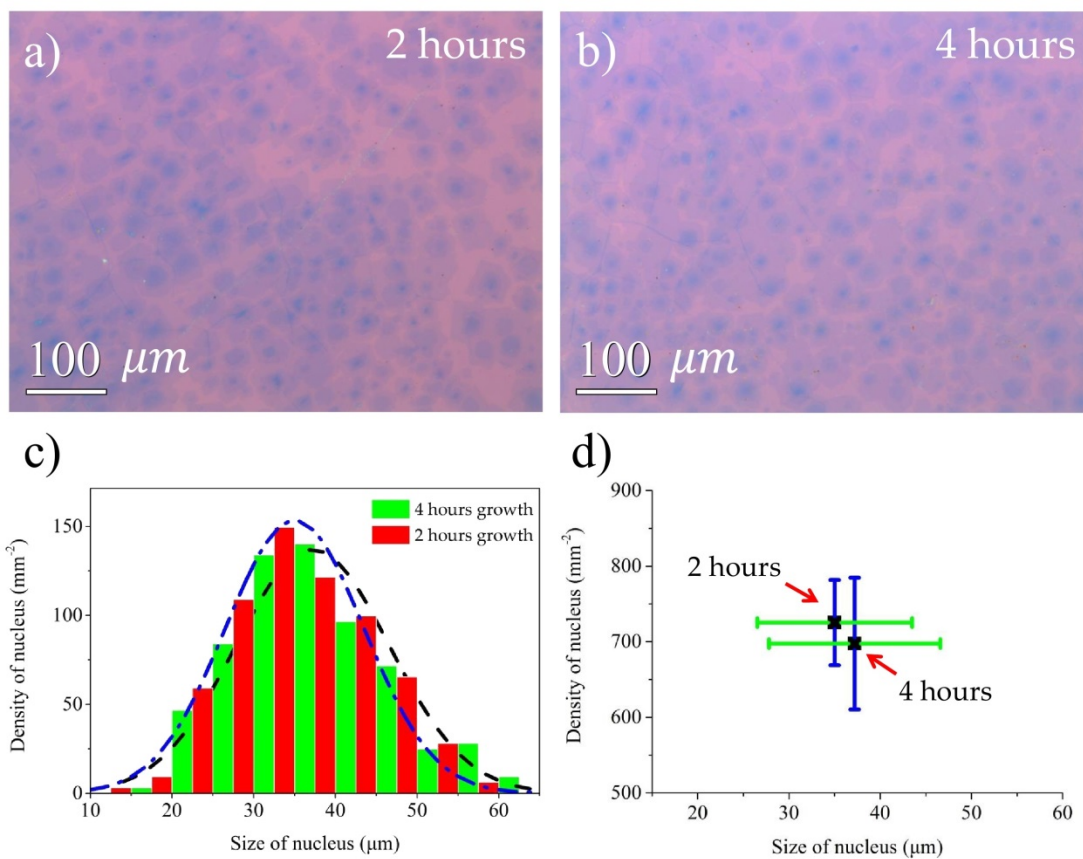

**Figure S1.** a, b) Optical images for continuous graphene sheet composed of large sized graphene grains with 2 hours and 4 hours growth time, respectively. c) The density & size statistics for 2 and 4 hours growth samples. d) Statistics data with error bars.

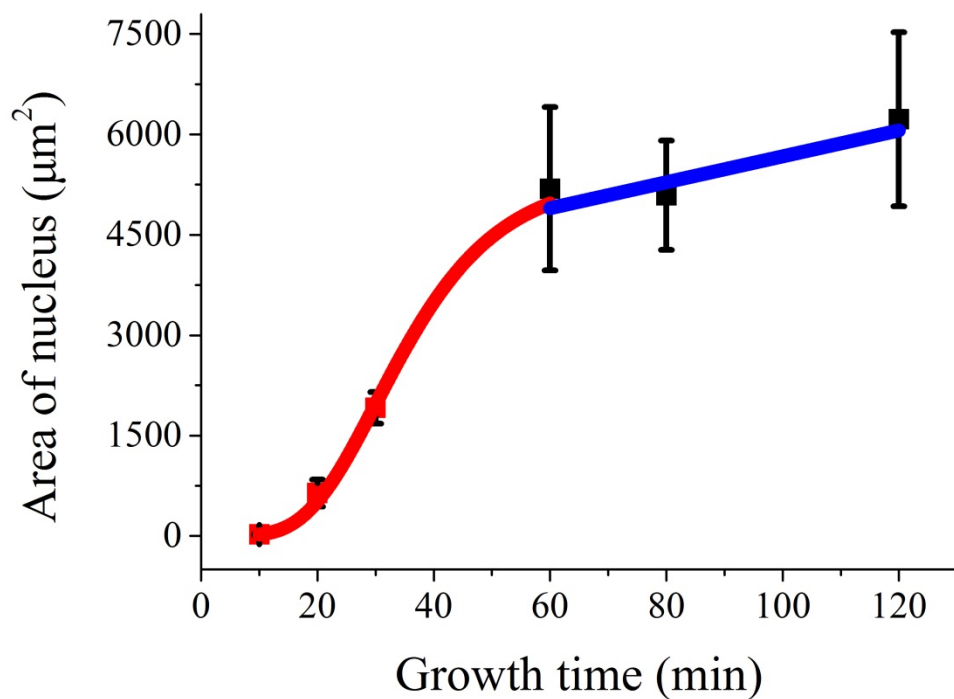

**Figure S2.** Plot of Area of nucleus vs. growth time. Before copper was full covered (0-60 min), this part was fitted with Gompertzian sigmoidal growth kinetics<sup>1</sup> according to adsorption-diffusion mechanism and the rest part (60-120 min) was fitted with straight line, represent the mechanism of gas phase penetration mechanism.

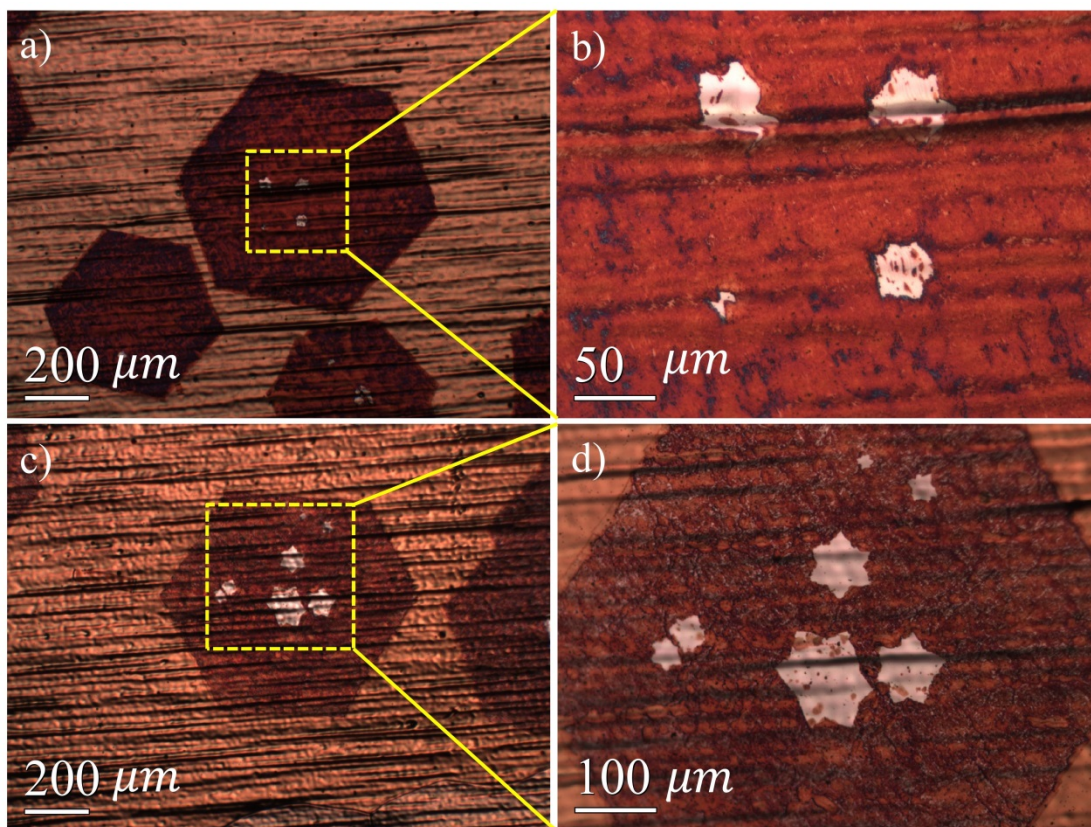

**Figure S3.** a, c) Single crystal graphene grains on oxidized copper (Visualization method treatment). b,d) Bilayer/trilayer grains reside in single crystalline monolayer graphene grains.

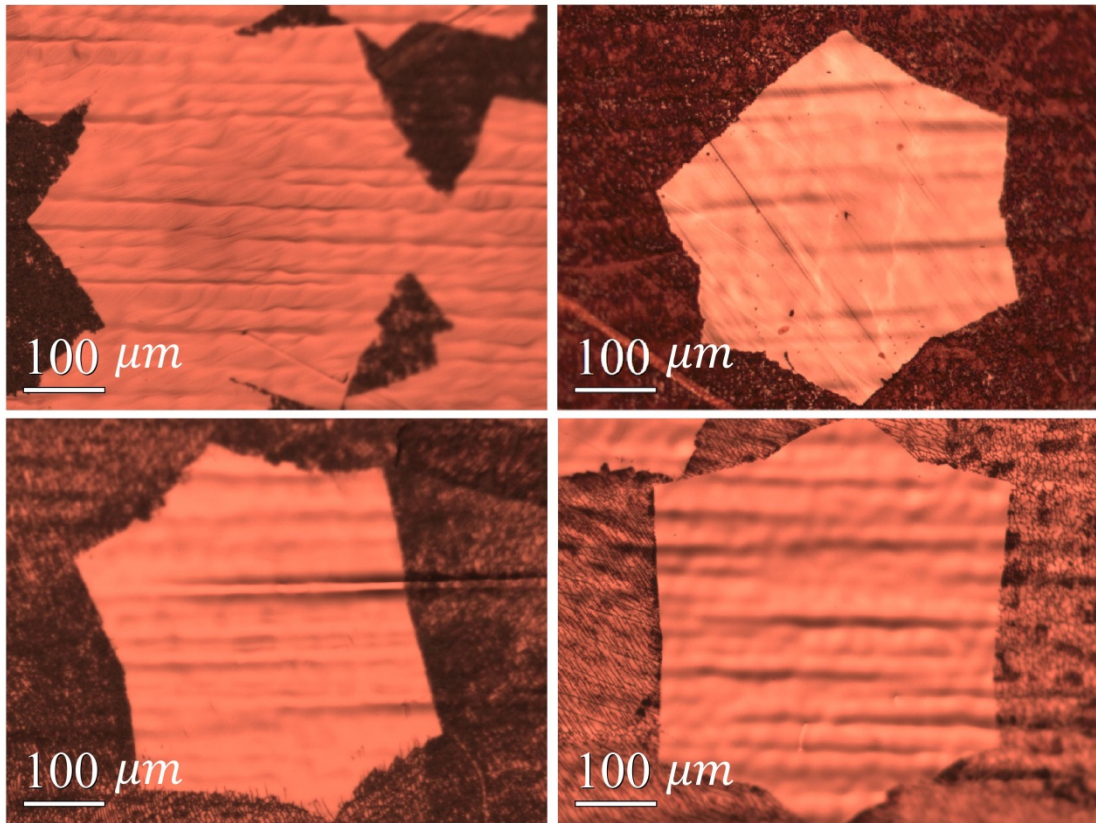

**Figure S4.** Large sized bilayer/few layers on copper substrate (visualization method treatment).

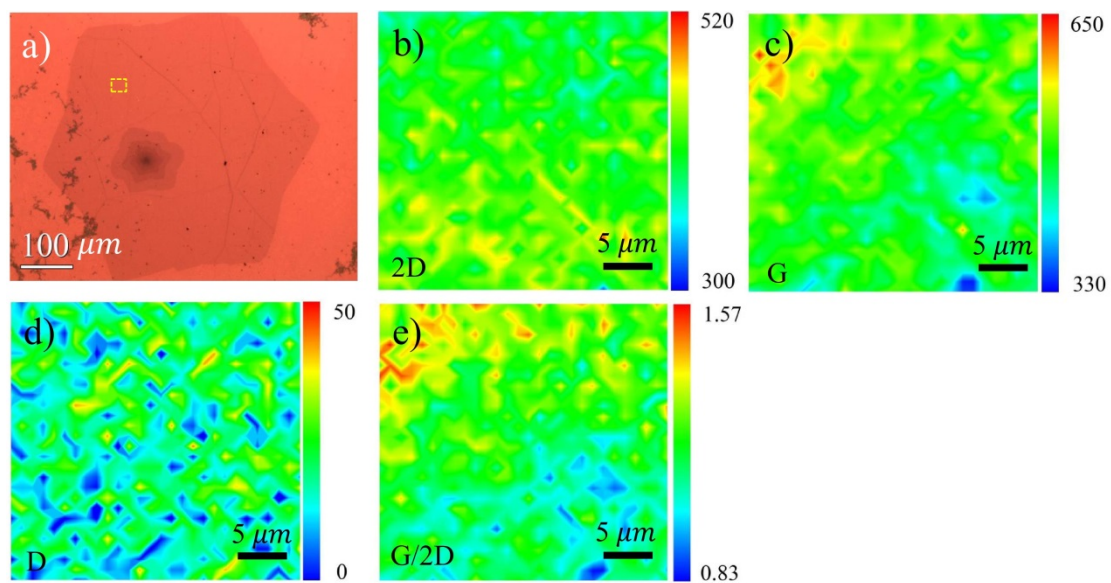

**Figure S5. Raman mapping for BL/FLG.** a) Optical image for synthesized bilayer graphene. b-d) two dimensional mapping Raman spectrum for 2D, G and D peak intensity, respectively. e) the mapping for ratio of G peak intensity to 2D peak intensity.

**Reference:**

- (1) Celebi, K.; Cole, M. T.; Choi, J. W.; Wyczisk, F.; Legagneux, P.; Rupesinghe, N.; Robertson, J.; Teo, K. B. K.; Park, H. G. *Nano Lett.* 2013, *13*, 967.
